# Supplementary material
Source: Springer Nature journal article supplement (https://www.springermedizin.de/resource/supplementary/12885_2007_869_MOESM9_ESM.pdf/9470540)

120 MINUTES

UROTHELIUM

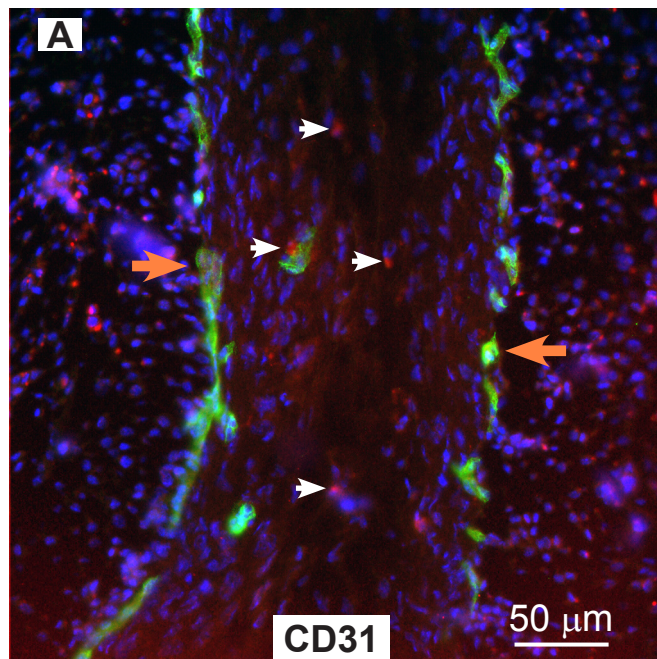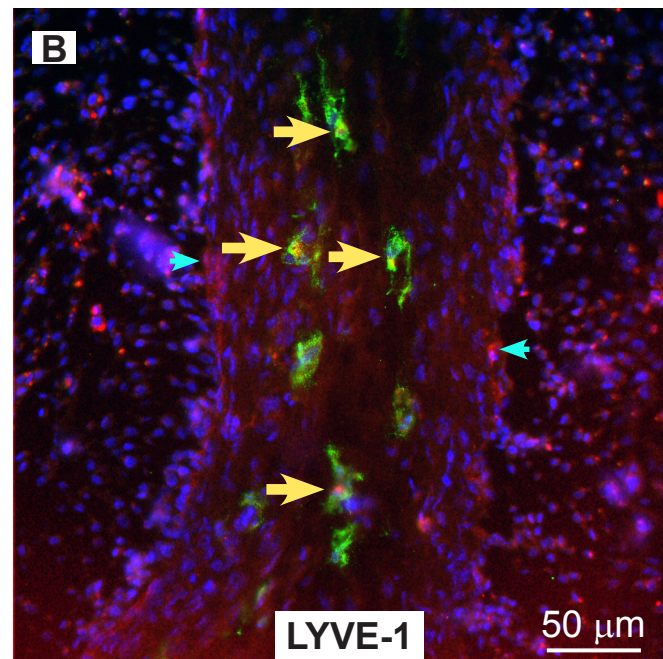

DETRUSOR  
SMOOTH MUSCLE

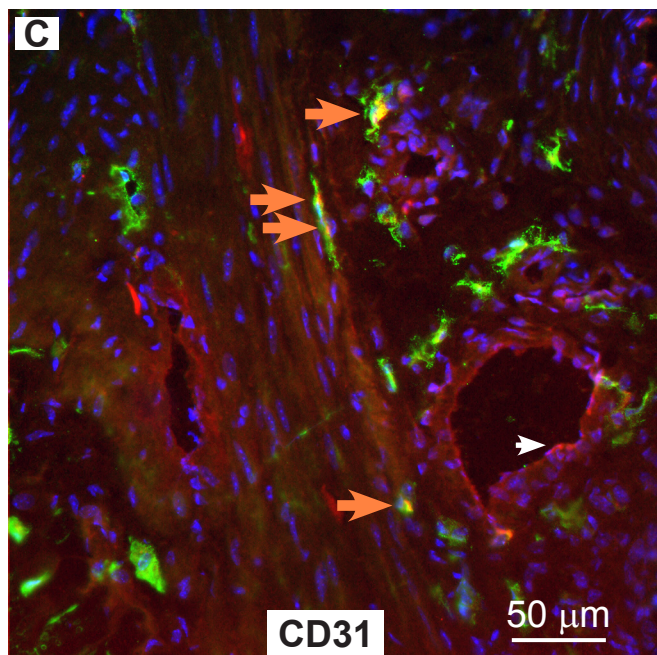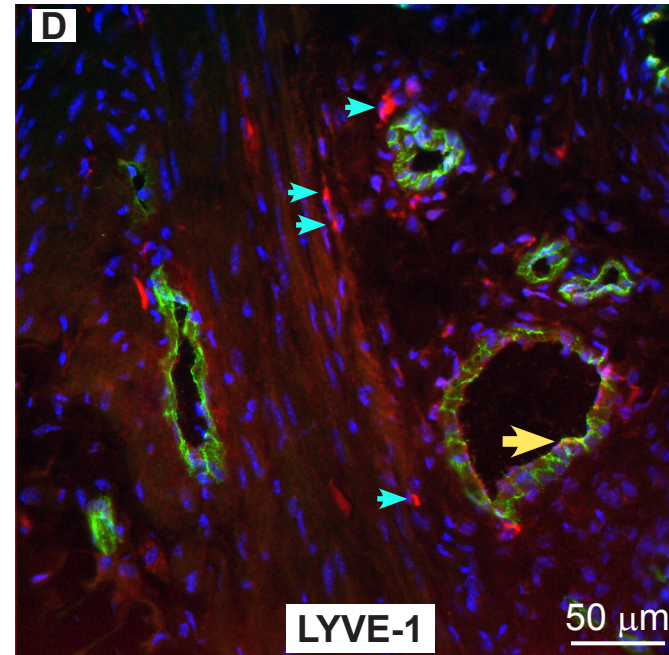

Supplement: MOESM9 [file 9470540]
